# Supplementary material
Source: PubMed Central journal article supplement (PMC2519875)
Supplement: NIHMS61227-supplement-si20060612_040.pdf [file NIHMS61227-supplement-si20060612_040.pdf]

Supporting Information for

## Metal Affinity Capture Tandem Mass Spectrometry for the Selective Detection of Phosphopeptides

Grady R. Blacken<sup>1</sup>, Michael H. Gelb<sup>1,2</sup>, and František Tureček<sup>1\*</sup>

<sup>1</sup>Department of Chemistry, Bagley Hall, Box 351700, University of Washington, Seattle, WA

98195-1700, USA. <sup>2</sup>Department of Biochemistry, University of Washington, Seattle, WA

Manuscript submitted to *Analytical Chemistry*, March 2006. Figures S1-S9 of mass spectra with captions.

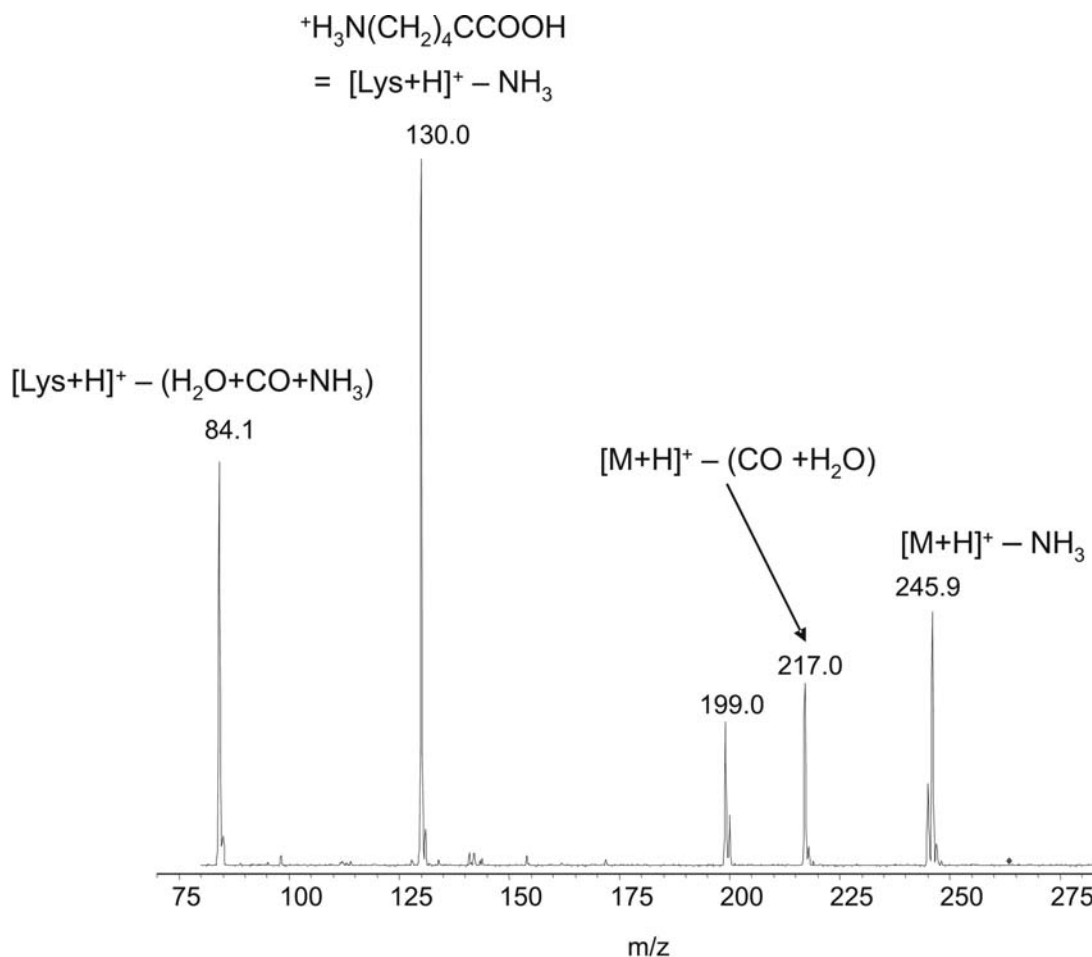

Figure S1. Collision-induced dissociation mass spectrum of protonated  $N_\alpha, N_\alpha$ -bis-(carboxymethyl)lysine ( $LysNTA + H$ )<sup>+</sup> at  $m/z$  263. CID spectrum obtained on a Bruker Esquire quadrupole ion trap.

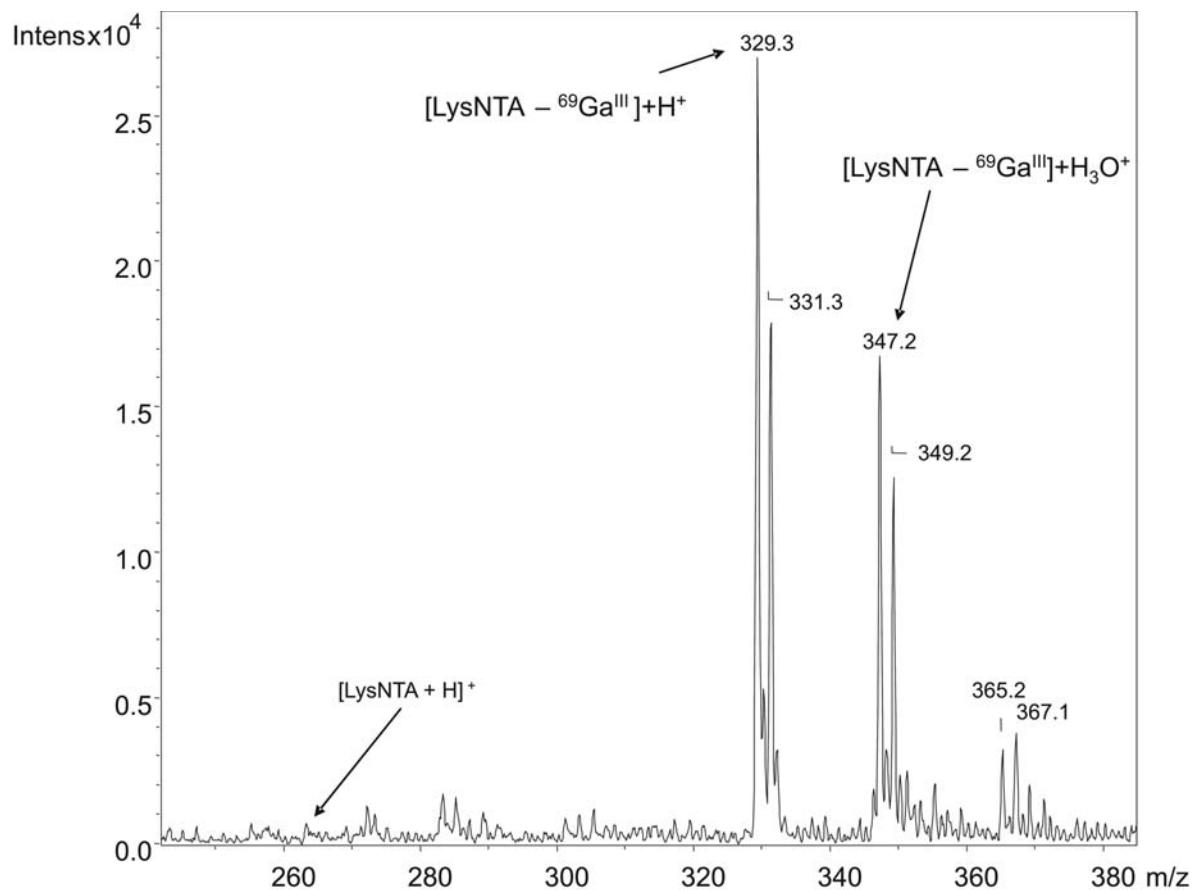

Figure S2. Electrospray mass spectrum (Bruker Esquire ion trap) of a complex formed from 25  $\mu\text{M}$  LysNTA and 50  $\mu\text{M}$   $\text{GaCl}_3$  in 1:1  $\text{CH}_3\text{OH}/\text{H}_2\text{O}$  buffered with 1% acetic acid. The position of the peak of  $(\text{LysNTA} + \text{H})^+$  is denoted by an arrow. The Ga-containing ions show splitting due to the presence of <sup>69</sup>Ga and <sup>71</sup>Ga isotopes.

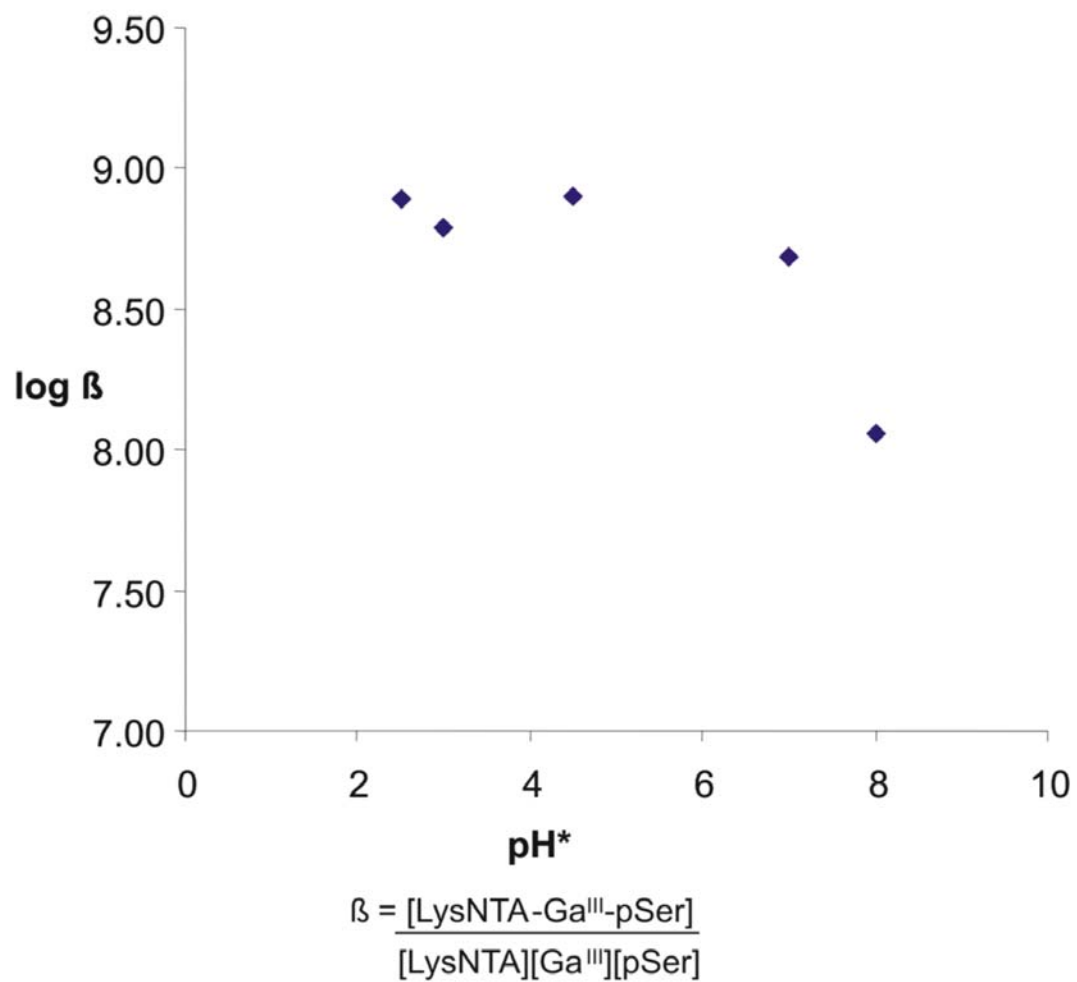

Figure S3. Formation constants for ternary complexes of LysNTA, Ga<sup>III</sup> and phosphoserine.

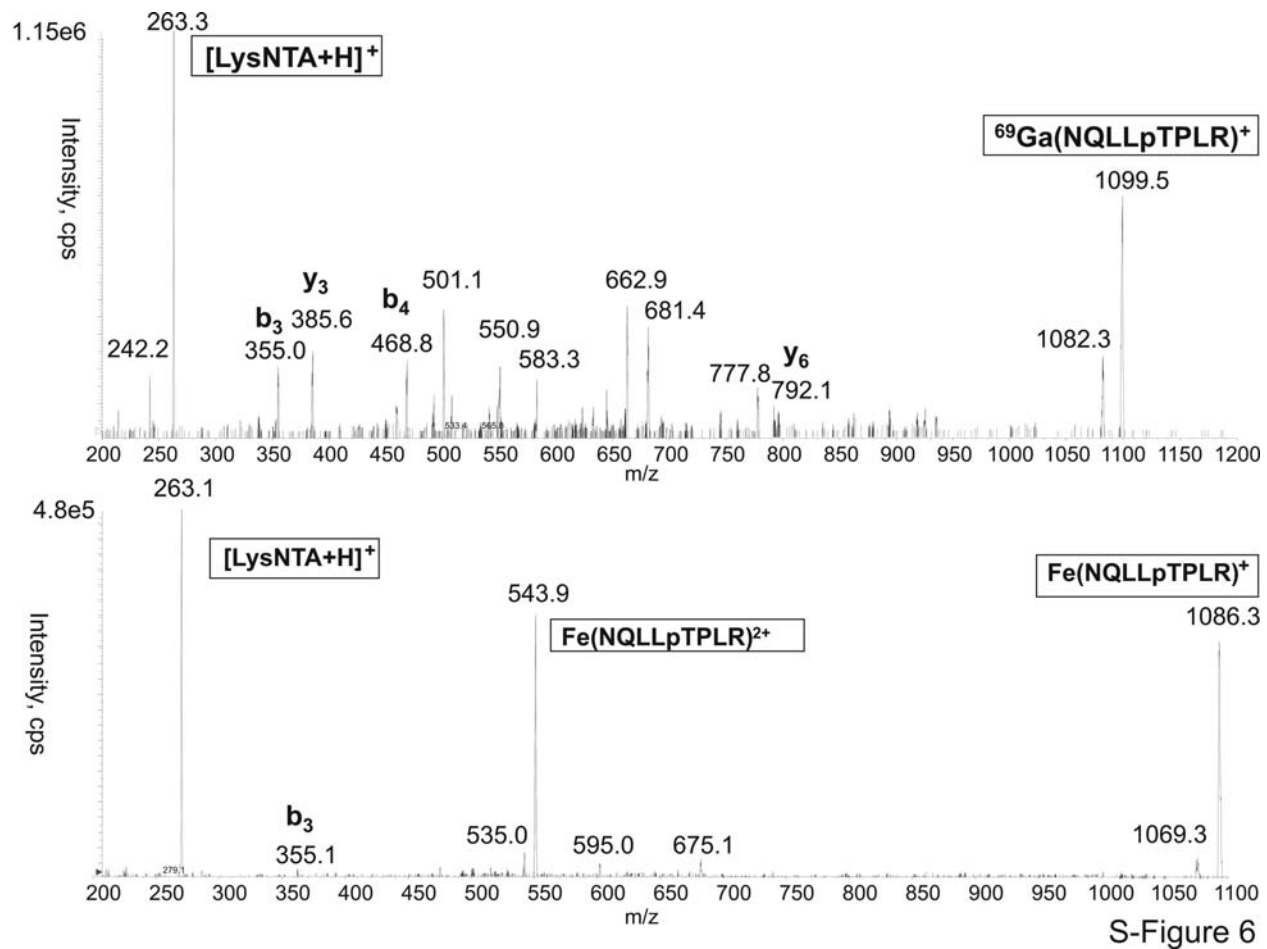

Figure S4. CID mass spectra of doubly charged LysNTA complexes with NQLLpTPLR and Ga<sup>III</sup> (top) and Fe<sup>III</sup> (bottom).

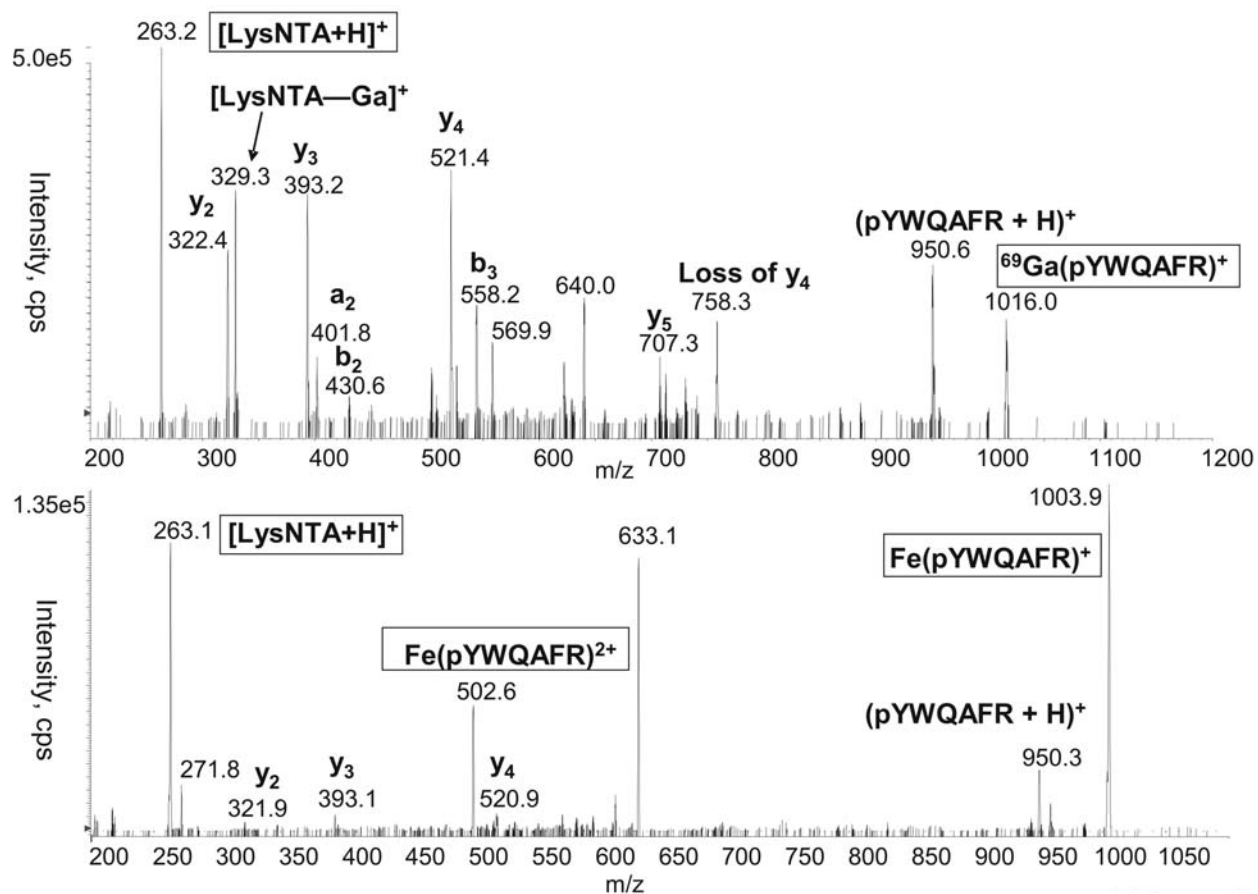

Figure S5. CID mass spectra of doubly charged LysNTA complexes with pYWQAFR and Ga<sup>III</sup> (top) and Fe<sup>III</sup> (bottom).

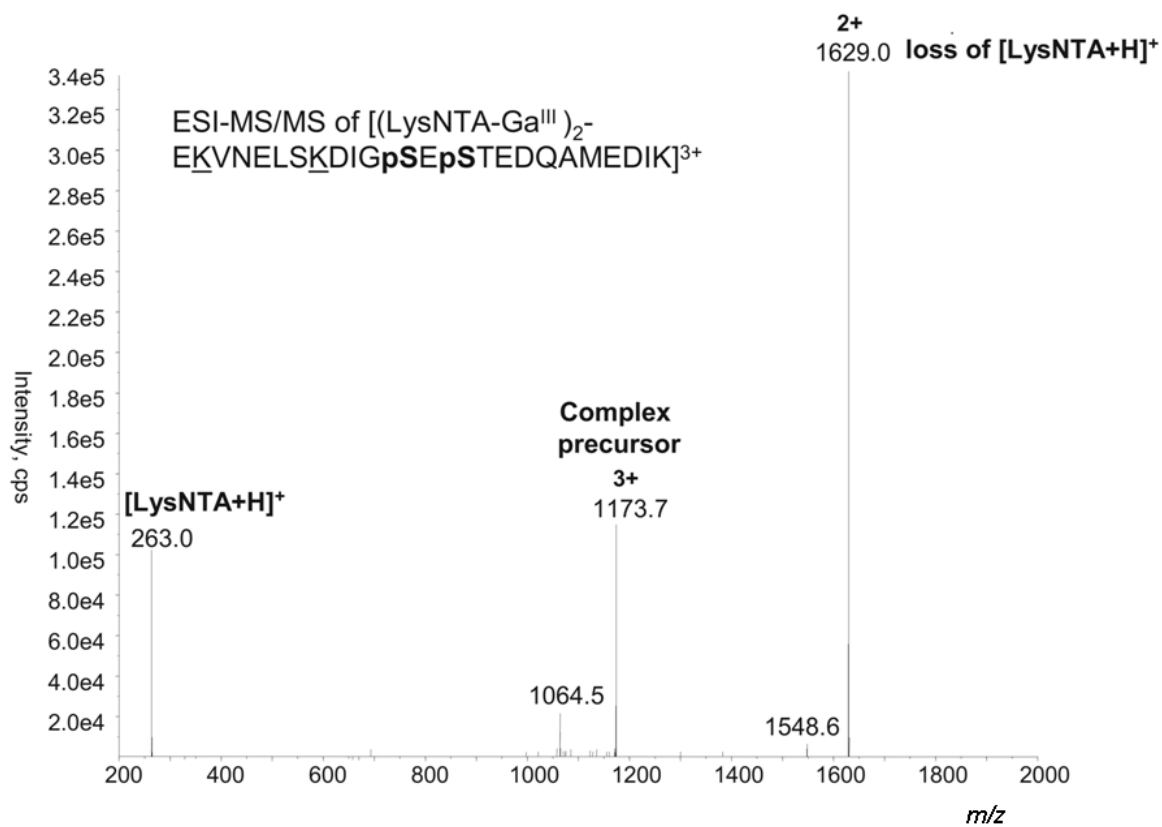

Figure S6. CID mass spectrum of a triply charged LysNTA-  $\text{Ga}^{\text{III}}$  complex with the  $\alpha$ -casein tryptic peptide EKVNELSKDIGpSEpSTEDQAMEDIK.

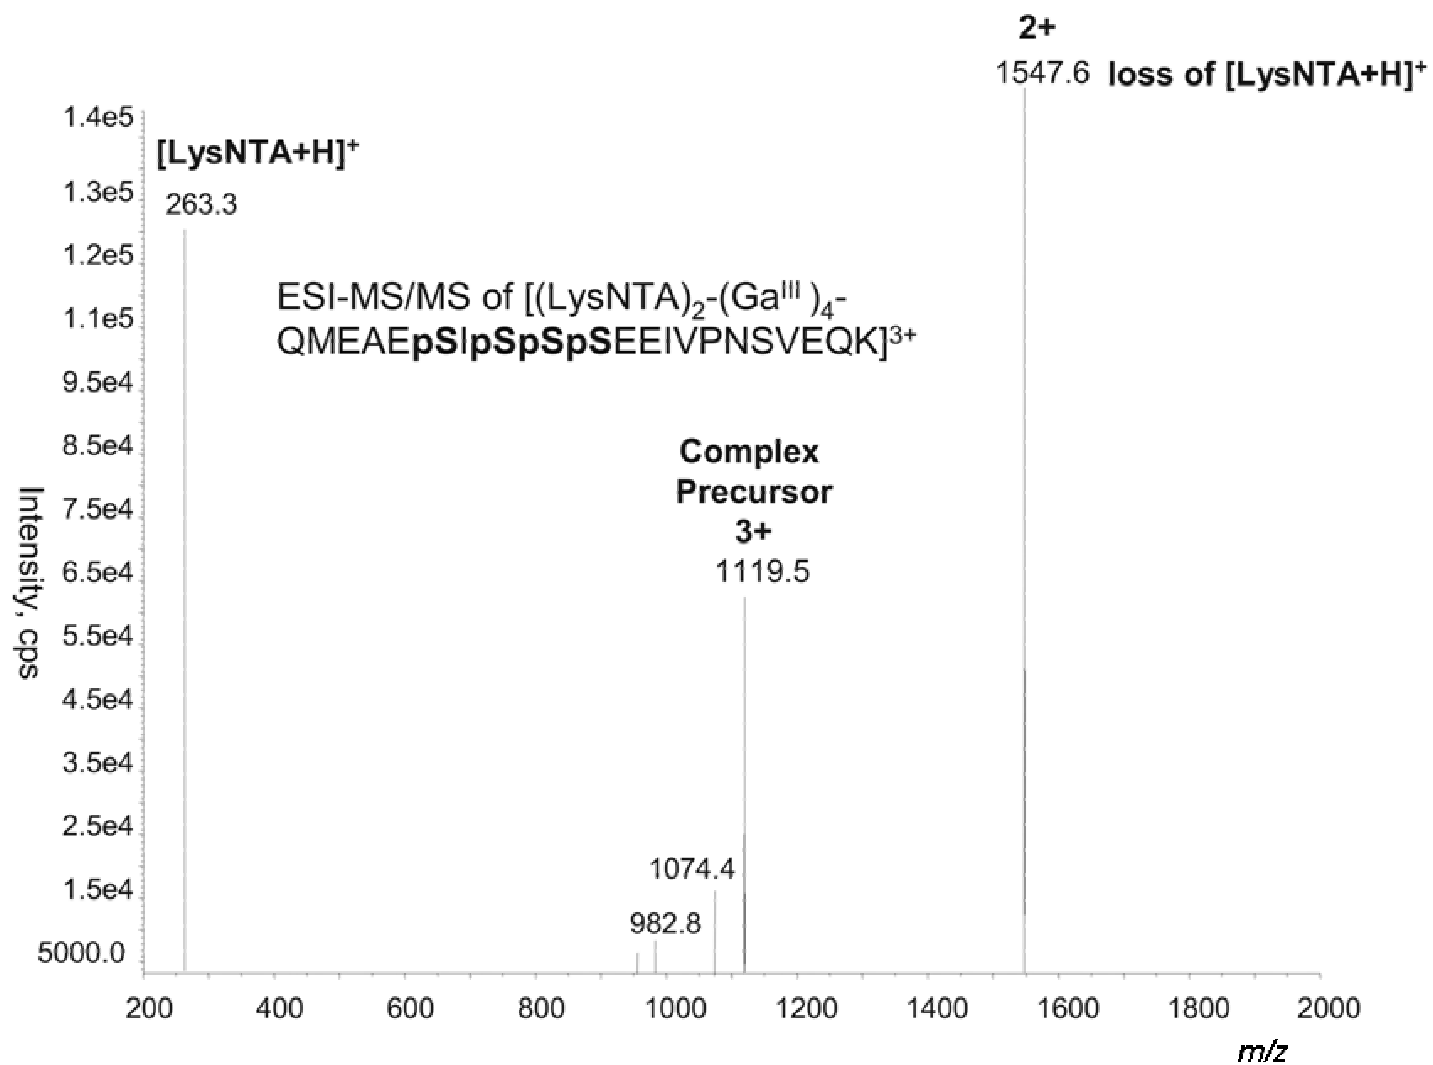

Figure S7. CID mass spectrum of a triply charged LysNTA-  $\text{Ga}^{\text{III}}$  complex with the  $\alpha$ -casein tryptic peptide QMEAEpSIpSpSpSEEIVPNSVEQK.

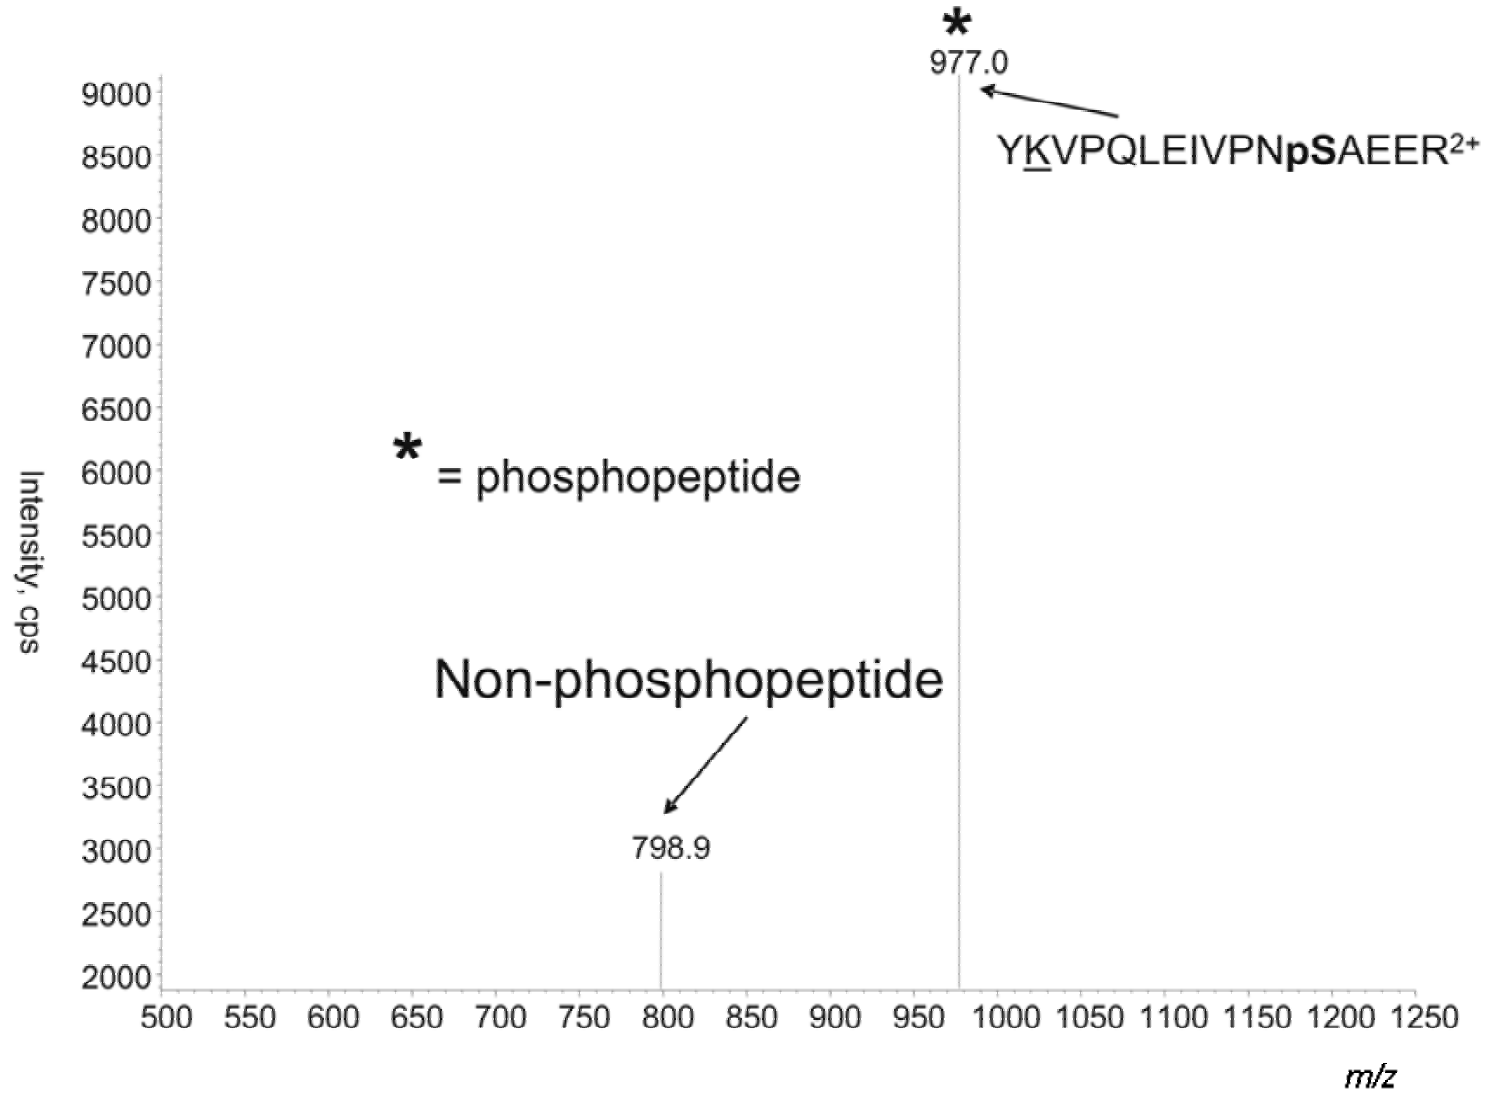

Figure S8. Neutral loss scan (49 Da difference) of phosphopeptides from trypsinolysis of 40 nM  $\alpha$ -casein.



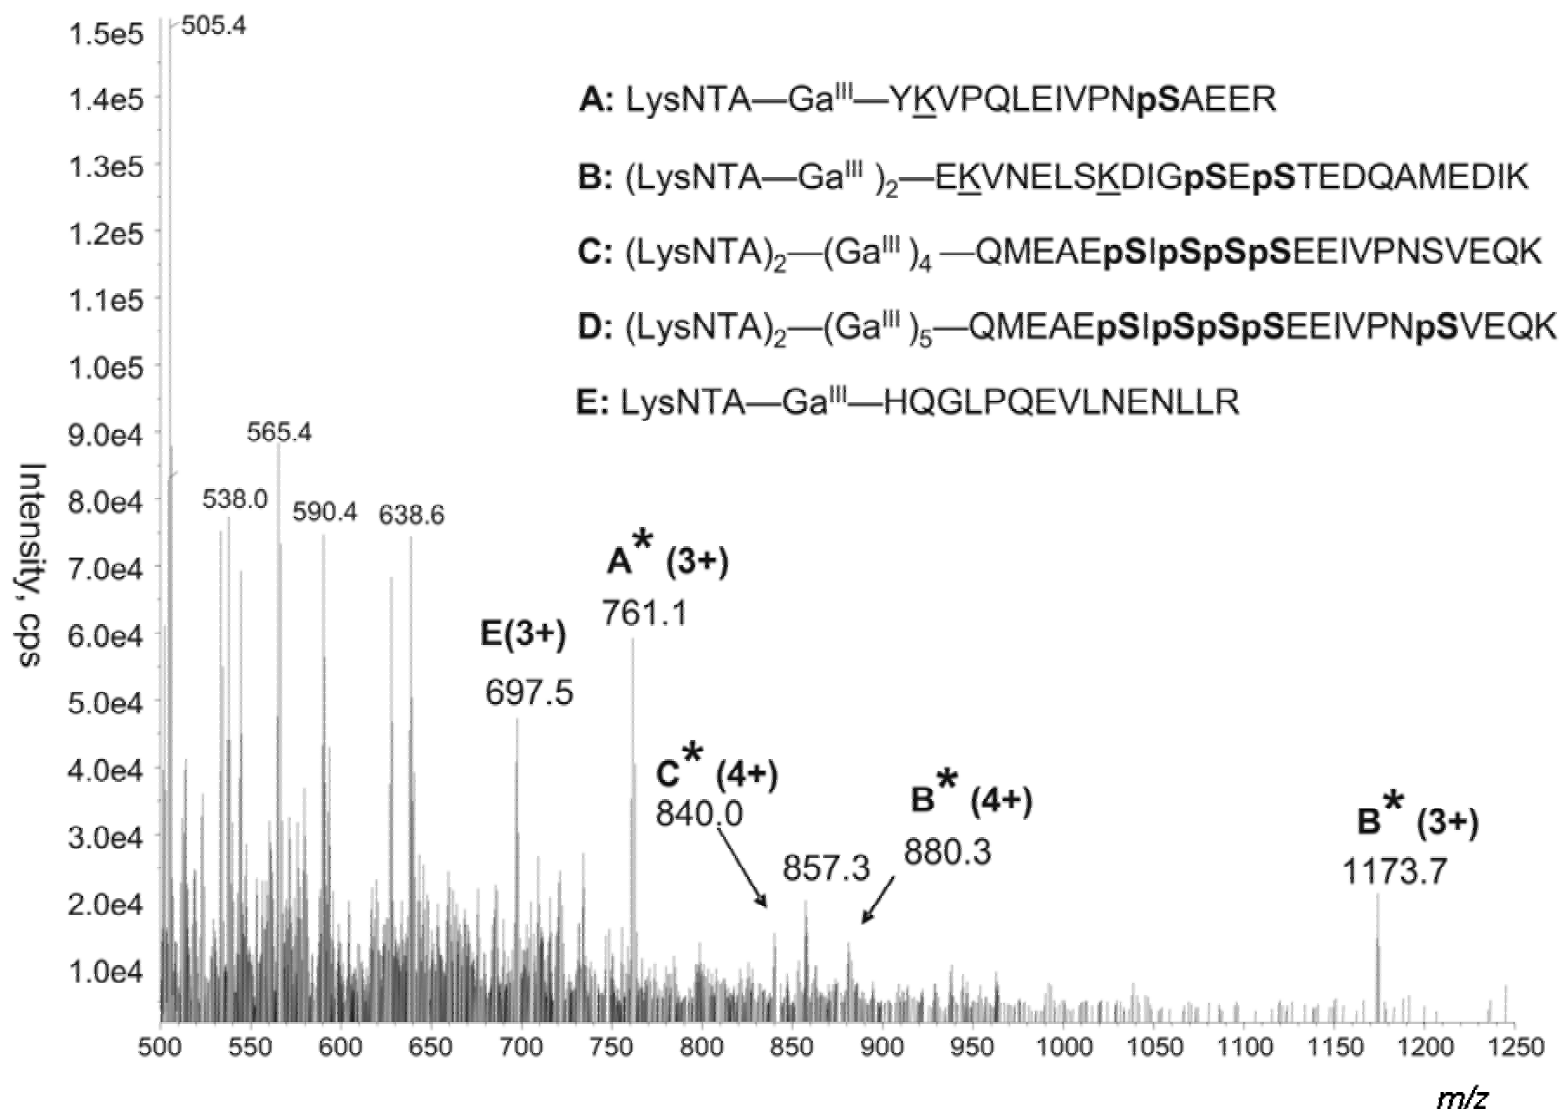

Figure S9. Parent scan ( $m/z$  263) detection of LysNTA-Ga<sup>III</sup> phosphopeptide complexes from trypsinolysis of 40 nM  $\alpha$ -casein.
